# Supplementary material
Source: publisher site journal article supplement (https://www.spandidos-publications.com/4489/downloadSupplementary)
Supplement: Supplementary file 1 [file downloadSupplementary]

## Sheet: Sheet1
Table SIII. Predicted results of interaction between hypoxia-related lncRNA signature and microRNAs.
lncRNA	miRNA
HLA-DQB1-AS1	hsa-miR-9
HLA-DQB1-AS1	hsa-miR-9ab
HLA-DQB1-AS1	hsa-miR-140
HLA-DQB1-AS1	hsa-miR-140-5p
HLA-DQB1-AS1	hsa-miR-876-3p
HLA-DQB1-AS1	hsa-miR-1244
HLA-DQB1-AS1	hsa-miR-145
HLA-DQB1-AS1	hsa-miR-199ab-5p
HLA-DQB1-AS1	hsa-miR-203
HLA-DQB1-AS1	hsa-miR-205
HLA-DQB1-AS1	hsa-miR-205ab
MIR205HG	hsa-miR-130ac
MIR205HG	hsa-miR-301ab
MIR205HG	hsa-miR-301b
MIR205HG	hsa-miR-301b-3p
MIR205HG	hsa-miR-454
MIR205HG	hsa-miR-721
MIR205HG	hsa-miR-4295
MIR205HG	hsa-miR-3666
MIR205HG	hsa-miR-133abc
MIR205HG	hsa-miR-143
MIR205HG	hsa-miR-1721
MIR205HG	hsa-miR-4770
MIR205HG	hsa-miR-145
MIR205HG	hsa-miR-148ab-3p
MIR205HG	hsa-miR-152
MIR205HG	hsa-miR-150
MIR205HG	hsa-miR-5127
MIR205HG	hsa-miR-183
MIR205HG	hsa-miR-192
MIR205HG	hsa-miR-215
MIR205HG	hsa-miR-194
MIR205HG	hsa-miR-199ab-5p
MIR205HG	hsa-miR-1ab
MIR205HG	hsa-miR-206
MIR205HG	hsa-miR-613
MIR205HG	hsa-miR-203
MIR205HG	hsa-miR-204
MIR205HG	hsa-miR-204b
MIR205HG	hsa-miR-211
MIR205HG	hsa-miR-205
MIR205HG	hsa-miR-205ab
MIR205HG	hsa-miR-214
MIR205HG	hsa-miR-761
MIR205HG	hsa-miR-3619-5p
MIR205HG	hsa-miR-216b
MIR205HG	hsa-miR-216b-5p
MIR205HG	hsa-miR-22
MIR205HG	hsa-miR-22-3p
MIR205HG	hsa-miR-221
MIR205HG	hsa-miR-222
MIR205HG	hsa-miR-222ab
MIR205HG	hsa-miR-1928
MIR205HG	hsa-miR-122
MIR205HG	hsa-miR-122a
MIR205HG	hsa-miR-1352
MIR205HG	hsa-miR-23abc
MIR205HG	hsa-miR-23b-3p
MIR205HG	hsa-miR-24
MIR205HG	hsa-miR-24ab
MIR205HG	hsa-miR-24-3p
MIR205HG	hsa-miR-27abc
MIR205HG	hsa-miR-27a-3p
MIR205HG	hsa-miR-29abcd
MIR205HG	hsa-miR-31
MIR205HG	hsa-miR-103a
MIR205HG	hsa-miR-107
MIR205HG	hsa-miR-107ab
MIR205HG	hsa-miR-124
MIR205HG	hsa-miR-124ab
MIR205HG	hsa-miR-506
MIR205HG	hsa-miR-33a-3p
MIR205HG	hsa-miR-365
MIR205HG	hsa-miR-365-3p
MIR205HG	hsa-miR-383
MIR205HG	hsa-miR-10abc
MIR205HG	hsa-miR-10a-5p
MIR205HG	hsa-miR-455-5p
MIR205HG	hsa-miR-128
MIR205HG	hsa-miR-128ab
MIR205HG	hsa-miR-129-5p
MIR205HG	hsa-miR-129ab-5p
MIR205HG	hsa-miR-490-3p
MIR205HG	hsa-miR-499-5p
TRBV11-2	hsa-miR-138
TRBV11-2	hsa-miR-138ab
TRBV11-2	hsa-miR-25
TRBV11-2	hsa-miR-32
TRBV11-2	hsa-miR-92abc
TRBV11-2	hsa-miR-363
TRBV11-2	hsa-miR-363-3p
TRBV11-2	hsa-miR-367
